# Supplementary material for: Discrimination of Methicillin-resistant Staphylococcus aureus by MALDI-TOF Mass Spectrometry with Machine Learning Techniques in Patients with Staphylococcus aureus Bacteremia
Source: MDPI journal article supplement (doi:10.3390/pathogens11050586), 2022-05-16
Supplement: s1 [file s1]

# Discrimination of Methicillin-resistant *Staphylococcus aureus* by MALDI-TOF Mass Spectrometry with Machine Learning Techniques in Patients with *Staphylococcus aureus* Bacteremia

## 1 Genetic Algorithm

Genetic algorithm (GA) was firstly proposed by John Holland in 1975 [1]. The GA was then carried forward by the student David Goldberg of Holland. A book about GA, i.e., Genetic Algorithms in Search, Optimization, and Machine Learning, written by Goldberg is a classic book of GA, describing the basic theory of GA [2]. GA has been successfully applied in many fields, such as chemical kinetics, computer architecture, feature selection for ML, filtering and signal processing, rule set production, scheduling, learning robot behavior, image processing, molecular structure optimization, power electronics design, climatology, financial mathematics, economics, linguistic analysis, automatic design, RNA structure prediction, etc [3]. Nowadays, GA is the basic and an important algorithm in the field of evolutionary computation, a research branch of artificial intelligence.

The procedure of GA is listed as follows.

Step 0. Preliminary step: Determine the encoding method and fitness function of the chromosome. The actual encoding way and the design of the fitness function will be illustrated in Results section. In addition, it is also necessary to determine the parameter settings of GA, such as population size, the probabilities of crossover and mutation, the range of parameters to be solved, and so on.

Step 1. Generate an initial population  $P$  randomly consisting of  $N_{chr}$  chromosomes.

Step 2. Evaluate the quality of each chromosome through the fitness function.

Step 3. Elite policy: Pick  $n_{Elt}$  chromosomes  $Elt\_P$  with the highest fitness values and store them.

Step 4. Population evolution: A new population  $P_{new}$  is generated through the following genetic operations.

Step 4-1. Selection: Randomly select  $n_C$  chromosomes, and generate a random number  $r_s$ . If  $r_s < p_{worst}$  (the probability of picking good or bad chromosomes), copy the individual with smallest fitness value among  $n_C$  chromosomes; otherwise, copy the individual with largest fitness value among  $n_C$  chromosomes.

Step 4-2. Crossover: Pick two chromosomes at random and generate a random number  $r_c$ . If  $r_c < p_{crossover}$  (probability of crossover), a two-point crossover is performed. The so-called two-point crossover is to randomly select two crossover points and swap the genes of the two chromosomes within the crossover points to produce two new chromosomes.

- Step 4-3. Mutation: For each chromosome, a random number  $rm$  is randomly generated. If  $rm < p\_mutation$  (probability of mutation), carry out mutation. The mutation is to randomly generate a mutation point, and regenerate the bit value for the gene at the mutation point. If the gene is encoded by binary, the 0 or 1 of the gene is reversed to 1 or 0.
- Step 5. Combine the  $Elt\_P$  elite chromosomes and the chromosomes obtained after mutation operation, and evaluate their fitness values.
- Step 6. Select the  $Nchr$  chromosomes with the highest fitness values among the merged chromosomes  $[P; Elt\_P]$  as the new population  $Pnew$ . Pick top  $nElt$  chromosomes with highest fitness values from  $Pnew$  and save them as  $Elt\_P$ .
- Step 7. Replace the old population  $P$  with the new population  $Pnew$ .
- Step 8. If the Stop condition of the evolution has not been met (for example, a fixed number of evolutions  $nGen$ ), go to Step 4 to continue the evolution; otherwise, go to Step 9.
- Step 9. Choose the one with the highest fitness value from  $Elt\_P$  as the best solution.

## 2 The design of GA for searching parameters of Support Vector Machine

The design of a chromosome and a fitness function for searching the optimal parameters of support vector machine (SVM) are introduced as follows, respectively.

- (1) Chromosome design: This study uses 29 binary bits to represent a chromosome, as shown in the example in Supplementary Fig. 1. The first 12 binary bits are used to represent the parameter  $C$ . The next 12 bits are used to represent the parameter  $\gamma$ . The last 5 bits are used to indicate the number of features of the sample. The decoding method of parameter  $C$  and  $\gamma$  is to use the following formula [4]:

$$R = min_R + d \frac{|max_R - min_R|}{2^l - 1},$$

where  $R$  represents the actual value of the parameter;  $min_R$  and  $max_R$  indicate the minimum and maximum values of the parameter, respectively.  $l$  represents the length of the bit string, and  $d$  is the decimal value of the bit string.

- (2) Fitness function definition: The fitness function  $fitness$  consists of two parts: weighted classification accuracy and weighted number of features as shown in below.

$$fitness = w_{acc} f_{acc} + w_{Nfea} f_{Nfea}, \text{ and } w_{acc} + w_{Nfea} = 1.$$

$w_{acc}$  represents the weight of classification accuracy of SVM, and  $f_{acc}$  is the accuracy of 10-fold cross-validation. 10-fold cross-validation means that split the training set into 10 smaller sets. The SVM model is trained using 9 of the folds as training data, and remaining set is regarded as a testing data. Take the average of the classification accuracy of 10 testing samples as the 10-fold cross-validation performance.  $w_{Nfea}$  is the weight of the number of features.  $f_{Nfea} = 1 / (N_{fea}^{1/6})$  is a

function of the number of features, where  $N_{fea}$  is the number of features in the training and testing samples.

### 3 Supplementary Figures and Tables

#### 3.1 Supplementary Figures

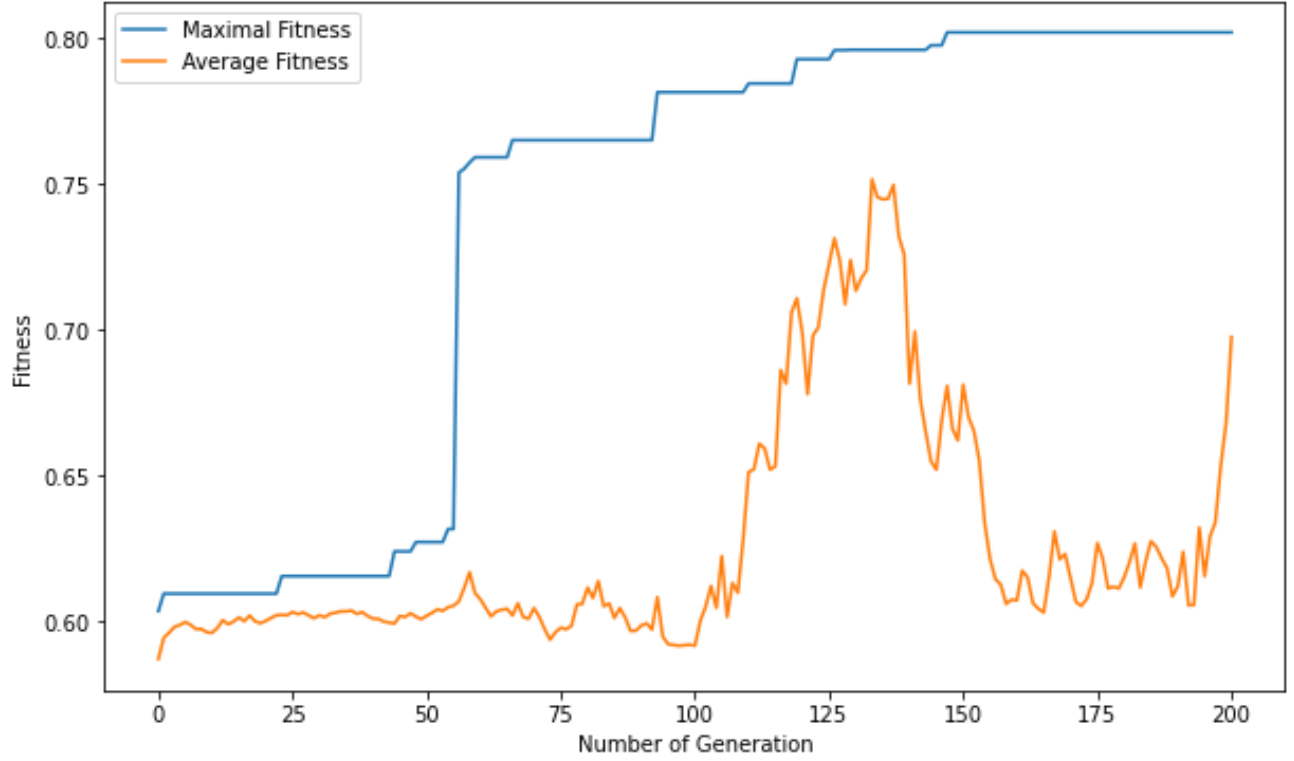

**Supplementary Figure S1.** The fitness values of GA during evolution for optimize SVM parameters. The maximum fitness values gradually increases, and the average fitness values oscillates randomly.

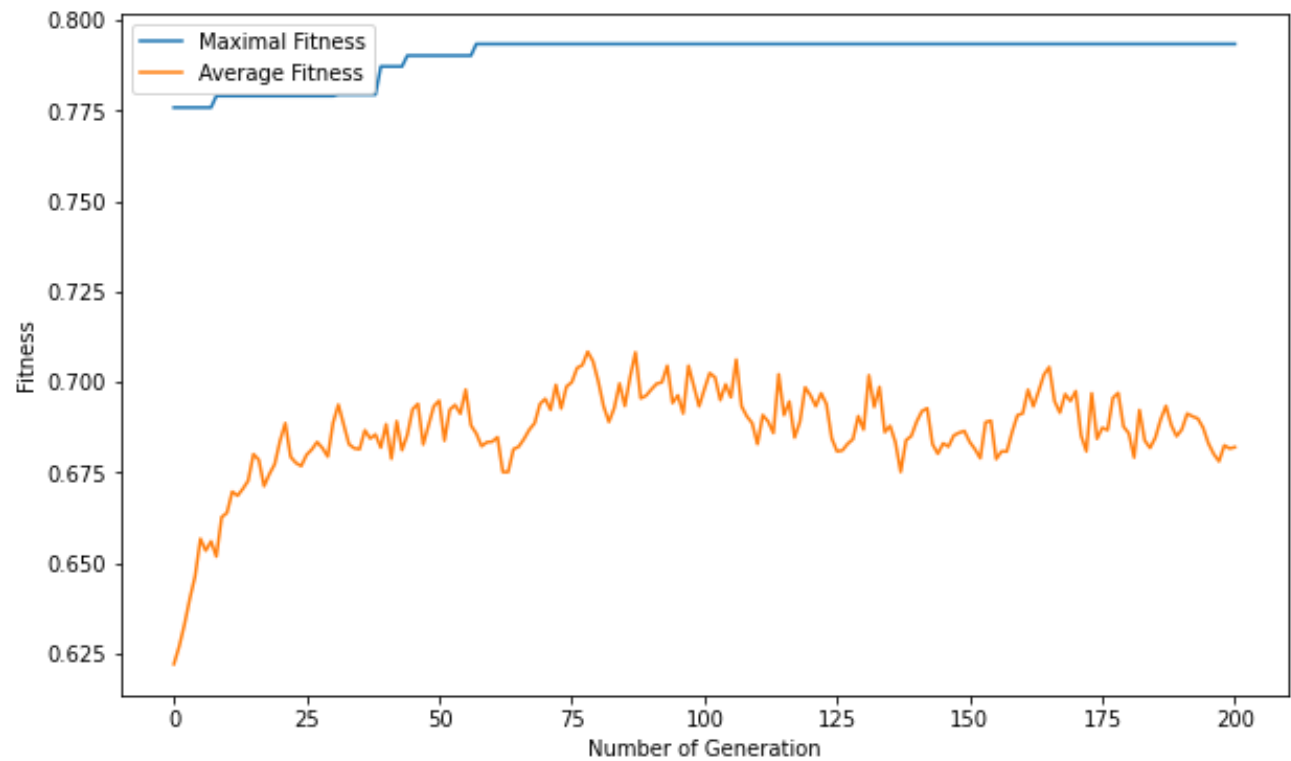

**Supplementary Figure S2.** The fitness values of GA during evolution for optimize DT parameters. The maximum fitness values gradually increases, and the average fitness values oscillates randomly.

### 3.2 Supplementary Tables

**Supplementary Table S1.** The classification performance of polynomial regression model in different number of features and different degrees. All important features mean all the features whose Feature Importance is greater than 0. Top 15 features mean the top 15 of all features in terms of Feature Importance. Degree  $n$  means that the highest power of the polynomial regression model is  $n$ .

| Degree | Measure     | Use all important features |                 | Use top 15 features |                 |
|--------|-------------|----------------------------|-----------------|---------------------|-----------------|
|        |             | Training samples           | Testing samples | Training samples    | Testing samples |
| 1      | Accuracy    | 0.8072                     | 0.7516          | 0.7848              | 0.7638          |
|        | Sensitivity | 0.7013                     | 0.6245          | 0.6477              | 0.6242          |
|        | Specificity | 0.8778                     | 0.8399          | 0.8756              | 0.8596          |
| 2      | Accuracy    | 1.0000                     | 0.5559          | 0.8529              | 0.7028          |
|        | Sensitivity | 1.0000                     | 0.5289          | 0.7956              | 0.6192          |
|        | Specificity | 1.0000                     | 0.5743          | 0.8914              | 0.7588          |
| 3      | Accuracy    | 1.0000                     | 0.5924          | 0.9996              | 0.5147          |
|        | Sensitivity | 1.0000                     | 0.5734          | 0.9996              | 0.5120          |
|        | Specificity | 1.0000                     | 0.6061          | 0.9997              | 0.5149          |
| 4      | Accuracy    | 1.0000                     | 0.5801          | 1.0000              | 0.5227          |
|        | Sensitivity | 1.0000                     | 0.5492          | 1.0000              | 0.5268          |
|        | Specificity | 1.0000                     | 0.6020          | 1.0000              | 0.5207          |

**Supplementary Table S2.** The parameter settings of GA for searching optimal parameters of SVM model.

| $N_{chr}$ | $N_{bit}$ | $p_{worst}$  | $p_{crossover}$ | $p_{mutation}$ | $nElt$     | $nC$   |
|-----------|-----------|--------------|-----------------|----------------|------------|--------|
| 60        | 12        | 0.1          | 0.9             | 0.1            | 2          | 2      |
| $min_C$   | $max_C$   | $min_\gamma$ | $max_\gamma$    | $w_{acc}$      | $w_{Nfea}$ | $nGen$ |
| 0.01      | 1000      | 0.0001       | 100             | 0.9            | 0.1        | 200    |

**Supplementary Table S3.** The parameter settings of GA for searching optimal parameters of DT model.

| $N_{chr}$   | Total bits  | $p_{worst}$ | $p_{crossover}$ | $p_{mutation}$ | $nElt$     | $nC$      | $min_{MD}$ | $max_{MD}$ |
|-------------|-------------|-------------|-----------------|----------------|------------|-----------|------------|------------|
| 60          | 35          | 0.1         | 0.9             | 0.2            | 2          | 2         | 5          | 100        |
| $min_{MSS}$ | $max_{MSS}$ | $min_{MSL}$ | $max_{MSL}$     | $min_{CA}$     | $max_{CA}$ | $w_{acc}$ | $w_{Nfea}$ | $nGen$     |
| 2           | 101         | 1           | 100             | 0              | 0.1        | 0.9       | 0.1        | 200        |

**Supplementary Table S4.** The parameter settings of GA for searching optimal parameters of RF model.

| $N_{chr}$  | Total bits  | $p\_worst$  | $p\_crossover$ | $p\_mutation$ | $nElt$     | $nC$       | $min_{NE}$ | $max_{NE}$ | $min_{MD}$ |
|------------|-------------|-------------|----------------|---------------|------------|------------|------------|------------|------------|
| 30         | 40          | 0.1         | 0.9            | 0.2           | 2          | 2          | 50         | 250        | 5          |
| $max_{MD}$ | $min_{MSS}$ | $max_{MSS}$ | $min_{MSL}$    | $max_{MSL}$   | $min_{CA}$ | $max_{CA}$ | $w_{acc}$  | $w_{Nfea}$ | $nGen$     |
| 100        | 2           | 101         | 1              | 100           | 0          | 0.1        | 0.9        | 0.1        | 200        |

**Supplementary Table S5.** Demonstration of raw data retrieved from samples' mass spectra.

| Sample | Label | peak1  | peak2  | peak3  | peak4  | peak5  | peak6  | peak7  |
|--------|-------|--------|--------|--------|--------|--------|--------|--------|
| S1     | -1    | 2026.7 | 2041.5 | 2069.4 | 2086.0 | 2099.1 | 2167.8 | 2245.4 |
| S2     | -1    | 2037.1 | 2068.8 | 2151.7 | 2167.8 | 2244.0 | 2650.2 | 2936.4 |
| S3     | -1    | 2068.9 | 2152.0 | 2515.5 | 2651.5 | 2761.9 | 3036.6 | 3055.2 |
| S4     | -1    | 2026.4 | 2038.4 | 2069.4 | 2085.5 | 2099.3 | 2167.1 | 2185.0 |

**Supplementary Table S6.** Structured data matrix extracted with reference peaks generated by binning method.

| Sample | Label | 2007 | 2027   | 2038   | 2054 | 2061 | 2069   | 2085   |
|--------|-------|------|--------|--------|------|------|--------|--------|
| S1     | -1    | 0.0  | 2026.7 | 2041.5 | 0.0  | 0.0  | 2069.4 | 2086.0 |
| S2     | -1    | 0.0  | 0.0    | 2037.1 | 0.0  | 0.0  | 2068.8 | 0.0    |
| S3     | -1    | 0.0  | 0.0    | 0.0    | 0.0  | 0.0  | 2068.9 | 0.0    |
| S4     | -1    | 0.0  | 2026.4 | 2038.4 | 0.0  | 0.0  | 2069.4 | 2085.5 |

**Supplementary Table S7.** Data matrix presented with data values.

| Sample | Label | 2007 | 2027 | 2038 | 2054 | 2061 | 2069 | 2085 |
|--------|-------|------|------|------|------|------|------|------|
| S1     | -1    | 0.0  | 3.3  | 4.3  | 0.0  | 0.0  | 10.0 | 7.7  |
| S2     | -1    | 0.0  | 0.0  | 4.0  | 0.0  | 0.0  | 7.2  | 0.0  |
| S3     | -1    | 0.0  | 0.0  | 0.0  | 0.0  | 0.0  | 3.0  | 0.0  |
| S4     | -1    | 0.0  | 5.0  | 6.7  | 0.0  | 0.0  | 15.8 | 10.6 |

**Supplementary Table S8.** Classification performance after manually elevating feature 2410 to 2417 to the most important feature.

| Based on optimal parameter settings      |             | SVM    | DT     | RF     | PR     |
|------------------------------------------|-------------|--------|--------|--------|--------|
| Training<br>(366 S/N samples)            | Accuracy    | 0.8578 | 0.8377 | 0.9630 | 0.7779 |
|                                          | Sensitivity | 0.8335 | 0.7649 | 0.9488 | 0.6279 |
|                                          | Specificity | 0.8741 | 0.8865 | 0.9726 | 0.8767 |
| Independent Testing<br>(182 S/N samples) | Accuracy    | 0.8248 | 0.7704 | 0.6806 | 0.7449 |
|                                          | Sensitivity | 0.7058 | 0.6875 | 0.6517 | 0.5965 |
|                                          | Specificity | 0.9027 | 0.8246 | 0.6995 | 0.8421 |

## References

1. Holland, J. H. (1975). Adaptation in natural and artificial systems. Ann Arbor: The University of Michigan press.
2. Goldberg, D. E. (1989). Genetic Algorithms in Search, Optimization, and Machine Learning. Reading, Massachusetts: Addison-Wesley.
3. Wikipedia contributors. (2021, September 11). List of genetic algorithm applications. In Wikipedia, The Free Encyclopedia. Retrieved 06:49, September 14, 2021, from [https://en.wikipedia.org/w/index.php?title=List\\_of\\_genetic\\_algorithm\\_applications&oldid=1043678413](https://en.wikipedia.org/w/index.php?title=List_of_genetic_algorithm_applications&oldid=1043678413)
4. Tao, Z., Huiling, L., Wenwen, W., and Xia, Y. (2019). GA-SVM based feature selection and parameter optimization in hospitalization expense modeling. Appl. Soft Comput., 75, 323-332. doi: 10.1016/j.asoc.2018.11.001
